# Supplementary material for: Novel metal oxides with promising high-temperature thermoelectric performance
Source: Royal Society of Chemistry journal article supplement (doi:10.1039/d1tc02404c), 2021-01-01
Supplement: d1tc02404c1.pdf [file d1tc02404c1.pdf]

## Novel Metal Oxides with Promising High-Temperature Thermoelectric Performance

Liyu Peng<sup>1,2</sup>, Naihua Miao<sup>1,2</sup>, Guanjie Wang<sup>1,2</sup>, Jian Zhou<sup>1,2</sup>, Stephen R. Elliott<sup>1,2,3,4</sup>,  
and Zhimei Sun<sup>1,2,\*</sup>

<sup>1</sup>*School of Materials Science and Engineering, Beihang University, Beijing 100191, China*

<sup>2</sup>*Center for Integrated Computational Materials Engineering, International Research Institute for Multidisciplinary Science, Beihang University, Beijing 100191, China*

<sup>3</sup>*Department of Chemistry, University of Cambridge, Cambridge CB2 1EW, UK*

<sup>4</sup>*Physical and Theoretical Chemistry Laboratory, University of Oxford, Oxford OX1 3QZ, UK*

\*Corresponding author EMAIL: zmsun@buaa.edu.cn (Zhimei Sun)

### Detailed computations: method of verification

In the detailed calculations of  $ATa_2O_6$  ( $A = Mg, Ca$ ) and  $SrTiO_3$ , the PBEsol exchange-correlation functional<sup>1</sup> was used better to describe the structural properties. The LDA +  $U$  method of Dudarev *et al.*<sup>2</sup> with  $U - J = 5^3$  and of Liechtenstein *et al.*<sup>4</sup> with  $U = 5$  eV and  $J = 0.64$  eV<sup>5</sup> were used for the Ta  $5d$  states of  $ATa_2O_6$  ( $A = Mg, Ca$ ) and the Ti  $3d$  states of  $SrTiO_3$ , respectively. Considering the underestimation of the size of the bandgap in GGA-based calculations, the Heyd-Scuseria-Ernzerhof (HSE06) hybrid functional<sup>6</sup>, with accurate exchange and correlation energy, was applied to calculate the band gaps of  $ATa_2O_6$  ( $A = Mg, Ca$ ), as shown in Fig. S1a and Fig. S1c. Our results coincide with the results of other theoretical calculations<sup>3</sup> and experimental results.<sup>7, 8</sup> Moreover, the spin-orbit coupling (SOC) effects on the electronic structure of  $ATa_2O_6$  ( $A = Mg, Ca$ ) and  $SrTiO_3$  were also studied (see Fig. S1b, Fig. S1d and Fig. S2a) but there are no obvious changes. Therefore, SOC effects are not considered in the following calculations. To accurately estimate the electronic-transport properties, fine  $k$ -point meshes of  $18 \times 18 \times 12$  for  $MgTa_2O_6$ ,  $20 \times 20 \times 20$  for  $CaTa_2O_6$  and  $27 \times 27 \times 27$  for  $SrTiO_3$  were used. Meanwhile, the scissor operator was also applied to correct the bandgap but leave the band dispersion unchanged. For  $CaTa_2O_6$ , the phonon dispersion was calculated with a  $2 \times 2 \times 2$  supercell and a  $2 \times 2 \times 2$   $k$ -point mesh. For the thermal-conductivity calculation of  $MgTa_2O_6$ , the linearized phonon version of the

Boltzmann transport equation was solved, considering only two- and three-phonon scattering processes, using the ShengBTE code.<sup>9</sup> The second-order interatomic force constants (IFCs) were obtained via a  $2 \times 2 \times 2$  supercell with a  $2 \times 2 \times 2$   $k$ -point mesh using density-functional perturbation theory (DFPT), as implemented in Phonopy.<sup>10</sup> The third-order IFCs were calculated using a  $2 \times 2 \times 2$  supercell and a  $1 \times 1 \times 1$   $k$ -point mesh with only the gamma point, where interactions further than third neighbors in the supercell were neglected.

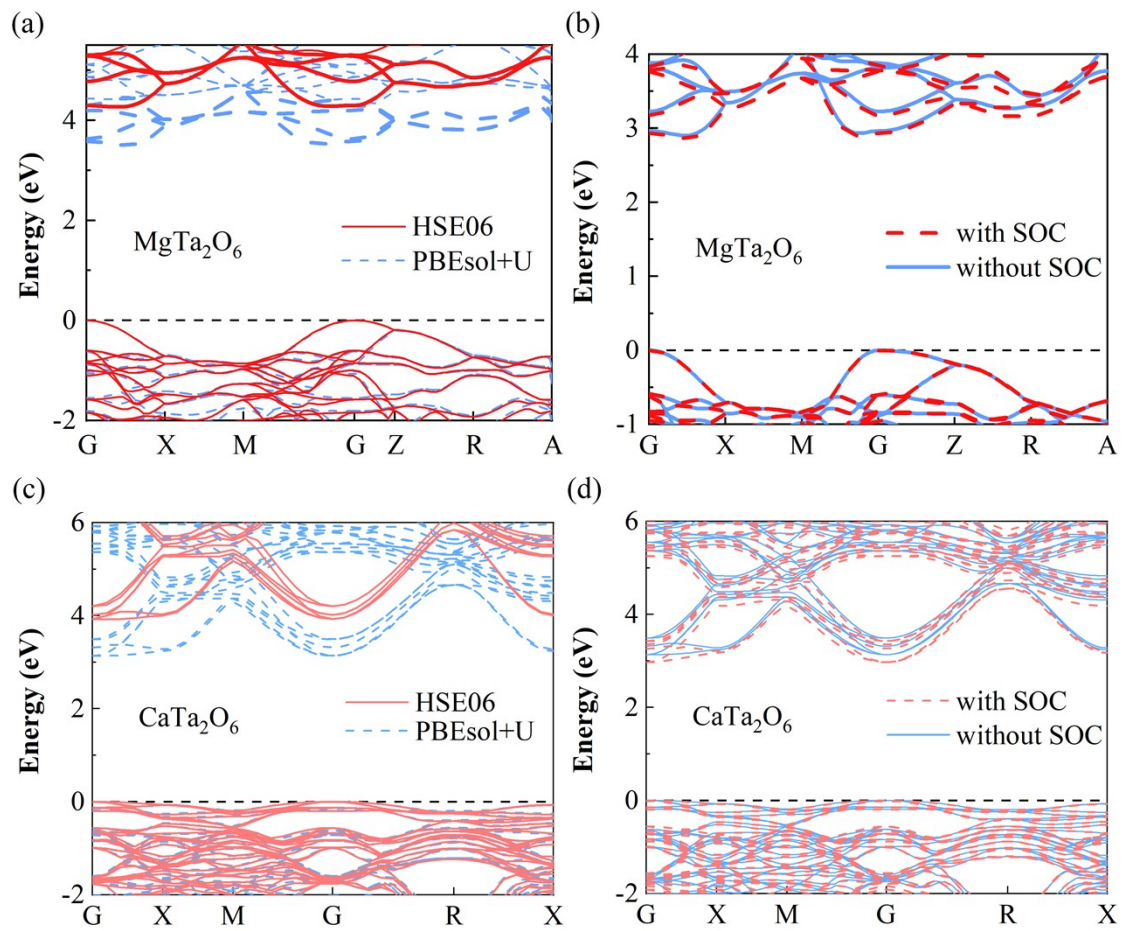

Fig S1. The effects of: (a) exchange-correlation functional; (b) spin-orbit coupling (SOC), on the electronic band structure of  $\text{MgTa}_2\text{O}_6$  calculated with the PBEsol exchange-correlation functional and without using the LDA + $U$  correction.

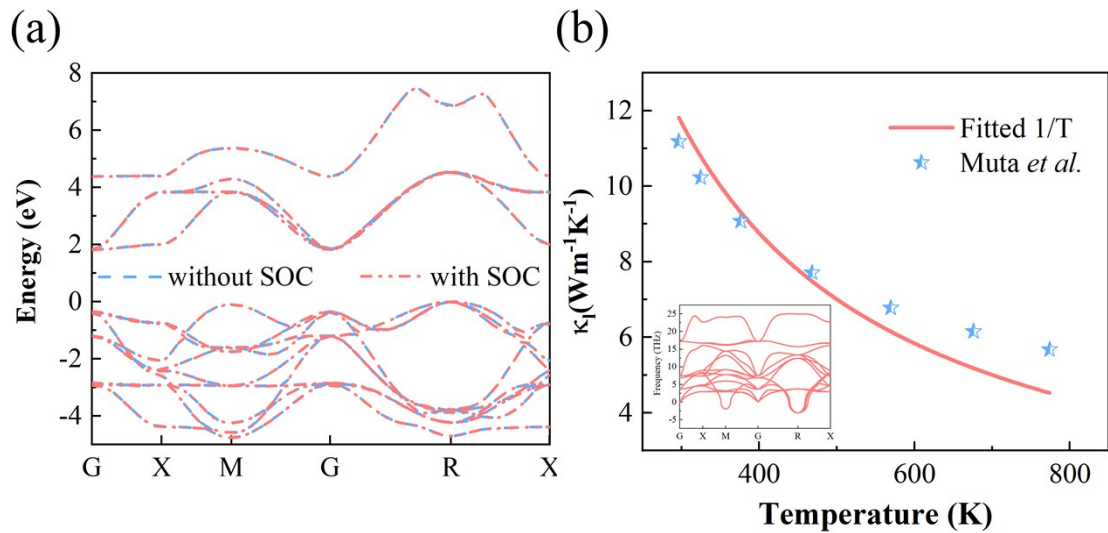

Fig S2 (a) The effects of spin-orbit coupling (SOC) on the electronic band structure of SrTiO<sub>3</sub> calculated with the PBEsol exchange-correlation functional. (b) The fitting curve plotting for SrTiO<sub>3</sub> with the  $\kappa_l \sim 1/T$  relation in which the data points for the temperature dependence of the lattice thermal conductivity are extracted from the experimental results of Muta *et al.*<sup>11</sup> The inset shows the phonon-dispersion curves for SrTiO<sub>3</sub> calculated at 0 K.

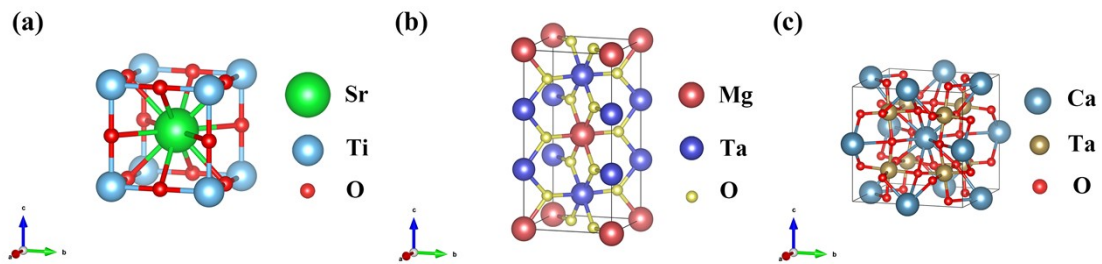

Fig S3 Crystal structure of: (a) SrTiO<sub>3</sub>; (b) MgTa<sub>2</sub>O<sub>6</sub>; (c) CaTa<sub>2</sub>O<sub>6</sub>.

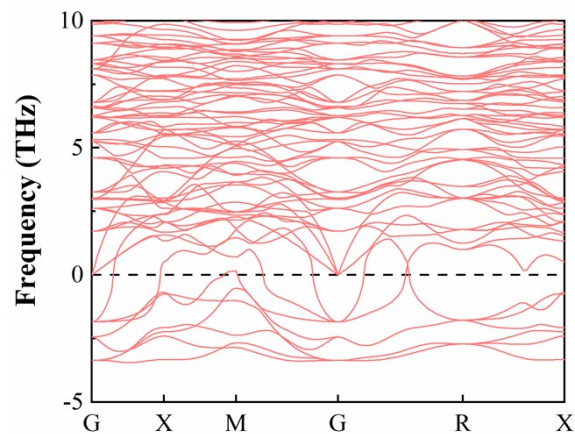

Fig S4 The phonon-dispersion curves for CaTa<sub>2</sub>O<sub>6</sub>.

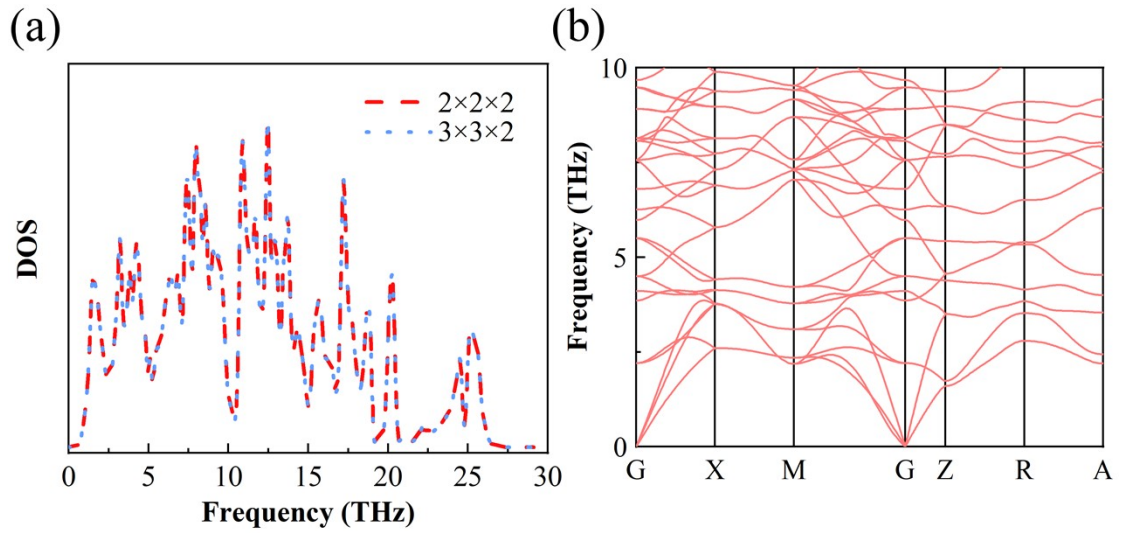

Fig. S5. (a) The phonon density of states of  $\text{MgTa}_2\text{O}_6$  computed from supercell expansions of  $2 \times 2 \times 2$  and  $3 \times 3 \times 2$ . (b) The phonon-dispersion curves for  $\text{MgTa}_2\text{O}_6$ .

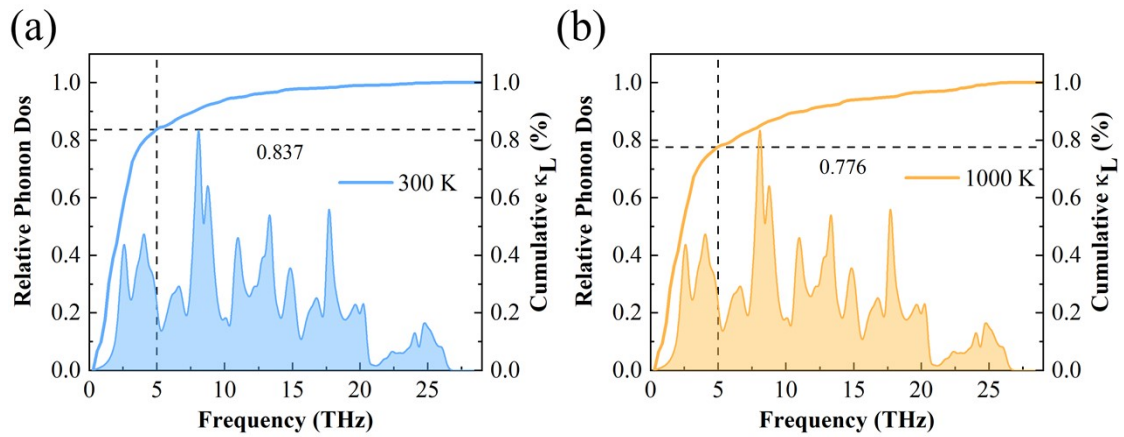

Fig. S6. The normalized phonon DOS and cumulative lattice thermal conductivity of  $\text{MgTa}_2\text{O}_6$  at: (a) 300 K; (b) 1000 K.

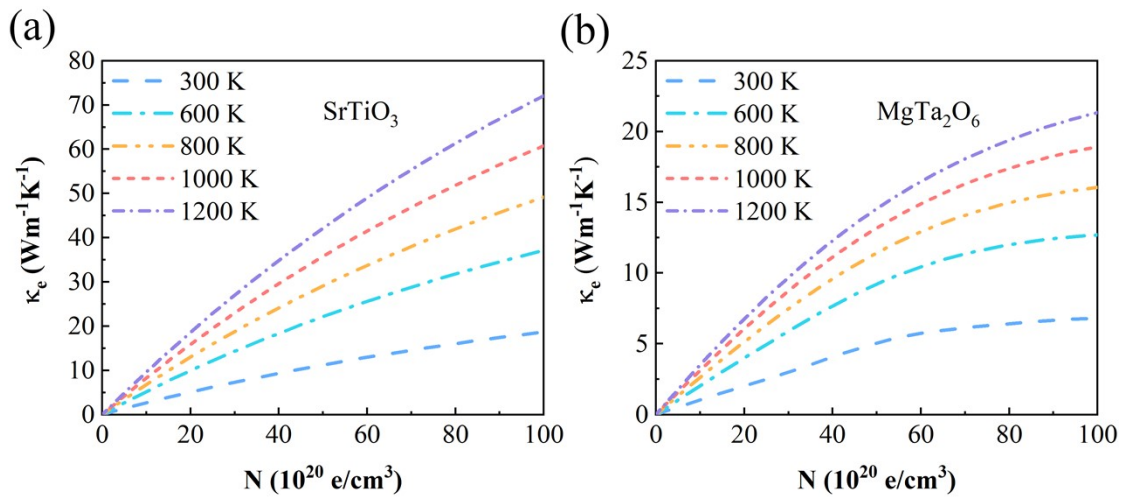

Fig. S7. Temperature-dependent electronic thermal conductivity of: (a) SrTiO<sub>3</sub>; and (b) MgTa<sub>2</sub>O<sub>6</sub>, as a function of carrier concentration.

Table S1 The formula, space-group symbols (SG), space-group numbers (SN), bandgap ( $E_g$ ), semiconductor type (n-type or p-type), and the corresponding carrier concentration ( $n_{max}$ ,  $p_{max}$ ), effective conductivity mass ( $m_c$ ) and Seebeck mass ( $m_s$ ), Fermi-surface complexity factors ( $N_v^*K^*$ ) calculated at the maximum  $PF$  of the binary and ternary oxides at 1000 K. The table of electrical-transport properties from  $KCoO_2$  onwards are left blank as their bandgaps are less than 0.1 eV (the bandgap screening criterion).

| formula          | SG           | SN  | $E_g$ | type | $n_{max}, p_{max}$<br>( $10^{20} \text{ cm}^{-3}$ ) | $m_s$<br>( $PF_{max}$ ) | $m_c$<br>( $PF_{max}$ ) | $N_v^*K^*$<br>( $PF_{max}$ ) | $PF_{max}$<br>( $\mu\text{W}/(\text{cmK}^2)$ ) |
|------------------|--------------|-----|-------|------|-----------------------------------------------------|-------------------------|-------------------------|------------------------------|------------------------------------------------|
| $Al_2O_3$        | $R\bar{3}c$  | 167 | 5.868 | p    | 50.000                                              | 6.387                   | 6.266                   | 1.029                        | 65.655                                         |
| $As_2O_3$        | $Fd\bar{3}m$ | 227 | 4.026 | n    | 10.000                                              | 2.566                   | 2.419                   | 1.093                        | 40.648                                         |
| $As_2O_5$        | $P4_12_12$   | 92  | 1.357 | n    | 100.000                                             | 5.139                   | 12.894                  | 0.252                        | 22.852                                         |
| $B_2O_3$         | $P3_121$     | 152 | 6.347 | n    | 25.000                                              | 3.133                   | 4.030                   | 0.686                        | 43.850                                         |
| $Ba_2ZrO_4$      | $I4/mmm$     | 139 | 3.156 | p    | 25.000                                              | 5.503                   | 6.700                   | 0.744                        | 55.952                                         |
| $Ba_3Mn_2O_8$    | $R\bar{3}m$  | 166 | 1.592 | n    | 10.000                                              | 2.531                   | 7.825                   | 0.184                        | 15.272                                         |
| $Ba_3Y_4O_9$     | $R32$        | 155 | 3.214 | n    | 100.000                                             | 6.864                   | 17.465                  | 0.246                        | 31.175                                         |
| $Ba_4Nb_2O_9$    | $P6_3/m$     | 176 | 3.518 | n    | 10.000                                              | 2.668                   | 5.681                   | 0.322                        | 18.188                                         |
| $Ba_5Ta_4O_{15}$ | $P\bar{3}m1$ | 164 | 3.083 | n    | 10.000                                              | 1.708                   | 85.310                  | 0.003                        | 44.049                                         |
| $Ba_8V_7O_{22}$  | $R\bar{3}m$  | 166 | 0.438 | p    | 10.000                                              | 2.480                   | 43460.5<br>45           | 0.000                        | 6.200                                          |
| $BaCoO_2$        | $P3_121$     | 152 | 1.129 | n    | 7.500                                               | 1.449                   | 2.123                   | 0.564                        | 23.531                                         |
| $BaHgO_2$        | $R\bar{3}m$  | 166 | 2.301 | p    | 25.000                                              | 5.325                   | 4.317                   | 1.370                        | 71.597                                         |
| $BaMnO_3$        | $P6_3/mmc$   | 194 | 1.932 | p    | 25.000                                              | 4.494                   | 5.488                   | 0.741                        | 44.279                                         |
| $BaMoO_4$        | $I4_1/a$     | 88  | 4.375 | p    | 25.000                                              | 6.377                   | 13.730                  | 0.317                        | 26.510                                         |
| $BaO_2$          | $I4/mmm$     | 139 | 2.218 | n    | 50.000                                              | 2.410                   | 1.054                   | 3.458                        | 238.158                                        |

|                                                 |              |     |       |   |         |       |        |       |         |
|-------------------------------------------------|--------------|-----|-------|---|---------|-------|--------|-------|---------|
| BaTa <sub>2</sub> O <sub>6</sub>                | $P6/mmm$     | 191 | 2.079 | n | 10.000  | 1.283 | 19.220 | 0.017 | 34.519  |
| BaTiO <sub>3</sub>                              | $Pm\bar{3}m$ | 221 | 1.676 | p | 50.000  | 5.436 | 2.284  | 3.671 | 141.781 |
| BaV <sub>6</sub> O <sub>11</sub>                | $P6_3mc$     | 186 | 0.603 | p | 10.000  | 2.838 | 14.050 | 0.091 | 9.105   |
| BaWO <sub>4</sub>                               | $I4_1/a$     | 88  | 0.970 | p | 25.000  | 5.892 | 23.310 | 0.127 | 13.606  |
| BaZnO <sub>2</sub>                              | $P3_121$     | 152 | 2.246 | p | 25.000  | 5.305 | 13.006 | 0.261 | 22.059  |
| BaZrO <sub>3</sub>                              | $Pm\bar{3}m$ | 221 | 3.121 | p | 50.000  | 5.298 | 2.362  | 3.358 | 132.278 |
| Ca <sub>2</sub> Hf <sub>7</sub> O <sub>16</sub> | $R\bar{3}$   | 148 | 4.303 | p | 7.500   | 3.443 | 29.249 | 0.040 | 11.757  |
| Ca <sub>2</sub> MnO <sub>4</sub>                | $I4_1/acd$   | 142 | 0.395 | n | 100.000 | 2.179 | 14.500 | 0.058 | 26.745  |
| Ca <sub>2</sub> Nb <sub>2</sub> O <sub>7</sub>  | $Fd\bar{3}m$ | 227 | 1.434 | n | 5.000   | 1.489 | 3.069  | 0.338 | 14.466  |
| Ca <sub>2</sub> Ta <sub>2</sub> O <sub>7</sub>  | $Fd\bar{3}m$ | 227 | 2.317 | n | 5.000   | 1.742 | 3.898  | 0.299 | 13.788  |
| CaCrO <sub>4</sub>                              | $I4_1/amd$   | 141 | 2.429 | p | 50.000  | 6.235 | 9.109  | 0.566 | 44.297  |
| CaMoO <sub>4</sub>                              | $I4_1/a$     | 88  | 3.769 | p | 25.000  | 6.180 | 13.213 | 0.320 | 37.637  |
| CaO                                             | $Fm\bar{3}m$ | 225 | 3.641 | p | 100.000 | 5.725 | 2.222  | 4.135 | 157.859 |
| CaO <sub>2</sub>                                | $I4/mmm$     | 139 | 2.784 | n | 75.000  | 4.278 | 5.283  | 0.729 | 201.574 |
| CaTa <sub>2</sub> O <sub>6</sub>                | $Pm\bar{3}$  | 200 | 2.455 | n | 10.000  | 1.876 | 0.651  | 4.889 | 100.692 |
| CaTa <sub>4</sub> O <sub>11</sub>               | $P6_322$     | 182 | 3.573 | n | 25.000  | 3.765 | 17.276 | 0.102 | 30.429  |
| CaV <sub>4</sub> O <sub>9</sub>                 | $P4/n$       | 85  | 2.447 | n | 25.000  | 5.405 | 43.869 | 0.043 | 7.783   |
| CdIn <sub>2</sub> O <sub>4</sub>                | $Fd\bar{3}m$ | 227 | 0.880 | p | 75.000  | 8.541 | 20.114 | 0.277 | 30.753  |
| CdO <sub>2</sub>                                | $Pa\bar{3}$  | 205 | 1.241 | p | 50.000  | 4.330 | 1.707  | 4.041 | 136.635 |
| CoO <sub>2</sub>                                | $P\bar{3}m1$ | 164 | 0.982 | p | 50.000  | 5.465 | 2.385  | 3.468 | 141.242 |
| Cr <sub>2</sub> O <sub>3</sub>                  | $R\bar{3}c$  | 167 | 2.401 | n | 10.000  | 2.755 | 4.805  | 0.434 | 22.446  |

|                                       |                |     |       |   |         |        |                |       |         |
|---------------------------------------|----------------|-----|-------|---|---------|--------|----------------|-------|---------|
| $\text{Cs}_2\text{V}_5\text{O}_{13}$  | $I4mm$         | 107 | 1.551 | p | 50.000  | 8.620  | 217.699        | 0.008 | 45.311  |
| $\text{Fe}_2\text{O}_3$               | $R\bar{3}c$    | 167 | 1.565 | p | 25.000  | 4.548  | 9.615          | 0.325 | 24.718  |
| $\text{Ga}_2\text{O}_3$               | $R\bar{3}c$    | 167 | 2.329 | p | 100.000 | 7.829  | 16.793         | 0.318 | 34.658  |
| $\text{GeO}_2$                        | $P\bar{3}_121$ | 152 | 3.215 | n | 100.000 | 3.247  | 3.378          | 0.942 | 40.151  |
| $\text{HfO}_2$                        | $Fm\bar{3}m$   | 225 | 3.804 | p | 25.000  | 2.798  | 0.824          | 6.252 | 146.918 |
| $\text{In}_2\text{O}_3$               | $Ia\bar{3}$    | 206 | 0.893 | p | 25.000  | 5.877  | 14.361         | 0.262 | 22.017  |
| $\text{K}_2\text{V}_3\text{O}_8$      | $P4bm$         | 100 | 2.000 | p | 50.000  | 16.569 | 355.152        | 0.010 | 15.828  |
| $\text{K}_2\text{Zn}_6\text{O}_7$     | $P4_2nm$       | 102 | 0.868 | p | 5.000   | 2.688  | 121.366        | 0.003 | 16.647  |
| $\text{K}_4\text{Zr}_5\text{O}_{12}$  | $P\bar{3}m1$   | 164 | 3.247 | p | 25.000  | 4.101  | 36.005         | 0.038 | 43.634  |
| $\text{K}_5\text{V}_3\text{O}_{10}$   | $P4_12_12$     | 92  | 3.058 | p | 10.000  | 3.138  | 108480.<br>705 | 0.000 | 0.502   |
| $\text{K}_6\text{CdO}_4$              | $P6_3mc$       | 186 | 1.599 | n | 1.000   | 0.430  | 0.472          | 0.868 | 15.113  |
| $\text{KO}_3$                         | $I4/mcm$       | 140 | 0.617 | n | 5.000   | 1.351  | 14.420         | 0.029 | 4.627   |
| $\text{KReO}_4$                       | $I4_1/a$       | 88  | 3.969 | p | 25.000  | 6.732  | 35.779         | 0.082 | 10.417  |
| $\text{Li}_3\text{CuO}_3$             | $P4_2/mnm$     | 136 | 1.175 | p | 100.000 | 9.545  | 41.065         | 0.112 | 21.358  |
| $\text{Mg}(\text{RhO}_2)_2$           | $Fd\bar{3}m$   | 227 | 1.177 | n | 10.000  | 2.197  | 0.915          | 3.719 | 88.450  |
| $\text{Mg}_2\text{Mo}_3\text{O}_8$    | $P6_3mc$       | 186 | 1.641 | p | 10.000  | 2.863  | 25.763         | 0.037 | 16.388  |
| $\text{Mg}_3\text{Nb}_6\text{O}_{11}$ | $P\bar{3}m1$   | 164 | 0.237 | p | 25.000  | 2.484  | 7.398          | 0.195 | 35.124  |
| $\text{Mg}_4\text{Nb}_2\text{O}_9$    | $P\bar{3}c1$   | 165 | 3.419 | p | 25.000  | 4.197  | 16.616         | 0.127 | 23.757  |
| $\text{Mg}_6\text{MnO}_8$             | $Fm\bar{3}m$   | 225 | 2.312 | p | 25.000  | 5.365  | 12.657         | 0.276 | 22.543  |
| $\text{MgCr}_2\text{O}_4$             | $Fd\bar{3}m$   | 227 | 2.814 | n | 7.500   | 1.741  | 1.357          | 1.453 | 42.422  |
| $\text{MgO}_2$                        | $Pa\bar{3}$    | 205 | 3.716 | n | 25.000  | 6.446  | 3.908          | 2.118 | 89.446  |



|                                                 |              |     |       |   |        |       |                      |       |         |
|-------------------------------------------------|--------------|-----|-------|---|--------|-------|----------------------|-------|---------|
| MgTa <sub>2</sub> O <sub>6</sub>                | $P4_2/mnm$   | 136 | 2.857 | n | 10.000 | 2.541 | 2.361                | 1.116 | 48.630  |
| MgTiO <sub>3</sub>                              | $R\bar{3}$   | 148 | 3.519 | p | 50.000 | 6.681 | 11.957               | 0.418 | 39.771  |
| Mn <sub>3</sub> O <sub>4</sub>                  | $I4_1/amd$   | 141 | 0.655 | n | 10.000 | 1.982 | 7.082                | 0.148 | 42.392  |
| MnO                                             | $Fm\bar{3}m$ | 225 | 0.120 | p | 25.000 | 3.937 | 1.138                | 6.436 | 171.612 |
| Na <sub>14</sub> Cd <sub>2</sub> O <sub>9</sub> | $P\bar{3}$   | 147 | 1.372 | n | 50.000 | 0.890 | 2.071                | 0.282 | 15.577  |
| Na <sub>2</sub> O <sub>2</sub>                  | $P\bar{6}2m$ | 189 | 1.717 | n | 50.000 | 1.066 | 5.199                | 0.093 | 58.822  |
| Na <sub>2</sub> Ta <sub>4</sub> O <sub>11</sub> | $R\bar{3}c$  | 167 | 3.494 | p | 25.000 | 5.457 | $\frac{1850.25}{5}$  | 0.000 | 22.424  |
| Na <sub>3</sub> CoO <sub>2</sub>                | $P4_2/mnm$   | 136 | 1.366 | n | 2.500  | 0.842 | 1.666                | 0.359 | 11.668  |
| Na <sub>4</sub> Ti <sub>5</sub> O <sub>12</sub> | $P\bar{3}$   | 147 | 2.502 | n | 25.000 | 4.057 | 29.237               | 0.052 | 60.598  |
| NaNbO <sub>2</sub>                              | $P6_3/mmc$   | 194 | 1.389 | n | 75.000 | 3.956 | 3.833                | 1.049 | 105.347 |
| NaNbO <sub>3</sub>                              | $R\bar{3}$   | 148 | 3.843 | n | 25.000 | 4.153 | 16.742               | 0.124 | 39.818  |
| Nb <sub>2</sub> O <sub>5</sub>                  | $I4/mmm$     | 139 | 1.493 | p | 10.000 | 2.837 | $\frac{82826.3}{58}$ | 0.000 | 13.573  |
| NbO <sub>2</sub>                                | $I4_1/a$     | 88  | 0.406 | n | 25.000 | 2.800 | 6.705                | 0.270 | 19.321  |
| Pb <sub>3</sub> O <sub>4</sub>                  | $P4_2/mbc$   | 135 | 1.113 | p | 7.500  | 2.323 | 3.022                | 0.674 | 27.230  |
| PoO <sub>2</sub>                                | $Fm\bar{3}m$ | 225 | 1.916 | n | 7.500  | 1.388 | 0.365                | 7.406 | 115.424 |
| Rb <sub>3</sub> TaO <sub>8</sub>                | $I\bar{4}2m$ | 121 | 3.083 | n | 10.000 | 2.343 | 5.910                | 0.250 | 21.906  |
| Rb <sub>3</sub> V <sub>5</sub> O <sub>14</sub>  | $P31m$       | 157 | 2.262 | n | 7.500  | 2.417 | 282.709              | 0.001 | 22.279  |
| RbScO <sub>2</sub>                              | $P6_3/mmc$   | 194 | 3.464 | p | 50.000 | 5.671 | 8.352                | 0.560 | 82.163  |
| Rh <sub>2</sub> O <sub>3</sub>                  | $R\bar{3}c$  | 167 | 0.669 | n | 25.000 | 4.487 | 3.880                | 1.243 | 60.565  |

|                                                  |              |     |       |   |         |       |              |       |         |
|--------------------------------------------------|--------------|-----|-------|---|---------|-------|--------------|-------|---------|
| Sb <sub>2</sub> O <sub>3</sub>                   | $Fd\bar{3}m$ | 227 | 3.290 | n | 25.000  | 2.239 | 1.153        | 2.707 | 74.308  |
| Sc <sub>2</sub> O <sub>3</sub>                   | $Ia\bar{3}$  | 206 | 3.826 | p | 10.000  | 3.800 | 6.207        | 0.479 | 24.558  |
| SeO <sub>2</sub>                                 | $P4_2/mbc$   | 135 | 3.235 | n | 5.000   | 1.363 | 2.179        | 0.495 | 36.767  |
| SiO <sub>2</sub>                                 | $P3_221$     | 154 | 5.727 | p | 25.000  | 6.469 | 9.033        | 0.606 | 51.325  |
| SnO <sub>2</sub>                                 | $P4_2/mnm$   | 136 | 0.619 | p | 25.000  | 2.538 | 2.906        | 0.817 | 36.058  |
| Sr <sub>3</sub> V <sub>2</sub> O <sub>7</sub>    | $I4/mmm$     | 139 | 0.534 | p | 25.000  | 1.689 | 1718.13<br>0 | 0.000 | 24.709  |
| Sr <sub>6</sub> (CoO <sub>3</sub> ) <sub>5</sub> | $R32$        | 155 | 0.373 | p | 10.000  | 2.886 | 87.441       | 0.006 | 1.639   |
| SrMoO <sub>4</sub>                               | $I4_1/a$     | 88  | 4.061 | p | 25.000  | 6.151 | 13.779       | 0.298 | 30.262  |
| SrO <sub>2</sub>                                 | $I4/mmm$     | 139 | 2.817 | n | 50.000  | 5.110 | 8.245        | 0.488 | 252.999 |
| SrTa <sub>4</sub> O <sub>11</sub>                | $P6_322$     | 182 | 3.550 | n | 25.000  | 3.678 | 13.727       | 0.139 | 27.717  |
| SrTiO <sub>3</sub>                               | $Pm\bar{3}m$ | 221 | 1.791 | n | 10.000  | 2.430 | 0.842        | 4.903 | 109.233 |
| SrV <sub>13</sub> O <sub>18</sub>                | $R\bar{3}$   | 148 | 0.108 | n | 50.000  | 1.503 | 61.895       | 0.004 | 1.033   |
| SrWO <sub>4</sub>                                | $I4_1/a$     | 88  | 0.687 | p | 25.000  | 5.429 | 7158.35<br>5 | 0.000 | 17.470  |
| SrZrO <sub>3</sub>                               | $Pm\bar{3}m$ | 221 | 3.307 | p | 100.000 | 5.604 | 2.138        | 4.244 | 158.530 |
| Te <sub>4</sub> O <sub>9</sub>                   | $R\bar{3}$   | 148 | 2.211 | p | 10.000  | 3.751 | 8.141        | 0.313 | 19.040  |
| TeO <sub>3</sub>                                 | $R\bar{3}c$  | 167 | 1.132 | p | 25.000  | 5.689 | 5.301        | 1.112 | 61.132  |
| TiO <sub>2</sub>                                 | $P4_2/mnm$   | 136 | 1.789 | n | 50.000  | 5.375 | 1.772        | 5.282 | 182.470 |
| V <sub>2</sub> O <sub>3</sub>                    | $Ia\bar{3}$  | 206 | 0.890 | n | 5.000   | 1.285 | 3.394        | 0.233 | 10.817  |
| VO <sub>2</sub>                                  | $P4_2/mnm$   | 136 | 0.882 | p | 25.000  | 4.251 | 2.646        | 2.036 | 90.812  |

|                                                  |              |     |       |   |        |       |        |       |         |
|--------------------------------------------------|--------------|-----|-------|---|--------|-------|--------|-------|---------|
| Y <sub>2</sub> O <sub>3</sub>                    | $Ia\bar{3}$  | 206 | 4.119 | p | 25.000 | 4.309 | 10.732 | 0.254 | 20.425  |
| ZnO <sub>2</sub>                                 | $Pa\bar{3}$  | 205 | 2.113 | p | 50.000 | 4.169 | 1.662  | 3.974 | 132.473 |
| ZrO <sub>2</sub>                                 | $P4_2/nmc$   | 137 | 4.045 | p | 50.000 | 7.532 | 3.302  | 3.446 | 167.613 |
| KCoO <sub>2</sub>                                | $I\bar{4}2d$ | 122 | 0.092 |   |        |       |        |       |         |
| BaV <sub>13</sub> O <sub>18</sub>                | $R\bar{3}$   | 148 | 0.075 |   |        |       |        |       |         |
| Sr <sub>5</sub> (CoO <sub>3</sub> ) <sub>4</sub> | $P\bar{3}c1$ | 165 | 0.057 |   |        |       |        |       |         |
| Ca <sub>3</sub> (CoO <sub>3</sub> ) <sub>2</sub> | $R\bar{3}c$  | 167 | 0.039 |   |        |       |        |       |         |
| Ba <sub>3</sub> W <sub>2</sub> O <sub>9</sub>    | $R\bar{3}c$  | 167 | 0.018 |   |        |       |        |       |         |
| PbO <sub>2</sub>                                 | $P4_2/mnm$   | 136 | 0.015 |   |        |       |        |       |         |
| Mg <sub>2</sub> VO <sub>4</sub>                  | $Fd\bar{3}m$ | 227 | 0.008 |   |        |       |        |       |         |
| Ba <sub>2</sub> Co <sub>9</sub> O <sub>14</sub>  | $R\bar{3}m$  | 166 | 0.000 |   |        |       |        |       |         |
| Ba <sub>2</sub> Nb <sub>15</sub> O <sub>32</sub> | $R\bar{3}$   | 148 | 0.000 |   |        |       |        |       |         |
| Ba <sub>2</sub> Nb <sub>5</sub> O <sub>9</sub>   | $P4/mmm$     | 123 | 0.000 |   |        |       |        |       |         |
| Ba <sub>3</sub> Cr <sub>2</sub> O <sub>8</sub>   | $R\bar{3}m$  | 166 | 0.000 |   |        |       |        |       |         |
| Ba <sub>3</sub> Ta <sub>5</sub> O <sub>15</sub>  | $P4/mbm$     | 127 | 0.000 |   |        |       |        |       |         |
| Ba <sub>5</sub> Co <sub>5</sub> O <sub>14</sub>  | $P\bar{3}m1$ | 164 | 0.000 |   |        |       |        |       |         |
| BaCoO <sub>3</sub>                               | $P6_3/mmc$   | 194 | 0.000 |   |        |       |        |       |         |
| BaIrO <sub>3</sub>                               | $Pm\bar{3}m$ | 221 | 0.000 |   |        |       |        |       |         |
| BaMoO <sub>3</sub>                               | $Pm\bar{3}m$ | 221 | 0.000 |   |        |       |        |       |         |
| BaNb <sub>4</sub> O <sub>6</sub>                 | $P4/mmm$     | 123 | 0.000 |   |        |       |        |       |         |

|                                                 |              |     |       |  |
|-------------------------------------------------|--------------|-----|-------|--|
|                                                 |              |     |       |  |
| BaRhO <sub>3</sub>                              | $P6_3/mmc$   | 194 | 0.000 |  |
| Bi <sub>2</sub> O <sub>3</sub>                  | $Pn\bar{3}m$ | 224 | 0.000 |  |
| BiO <sub>2</sub>                                | $Fm\bar{3}m$ | 225 | 0.000 |  |
| Ca <sub>2</sub> IrO <sub>4</sub>                | $P\bar{6}2m$ | 189 | 0.000 |  |
| CaMn <sub>7</sub> O <sub>12</sub>               | $Im\bar{3}$  | 204 | 0.000 |  |
| CdO                                             | $Fm\bar{3}m$ | 225 | 0.000 |  |
| Co <sub>3</sub> O <sub>4</sub>                  | $Fd\bar{3}m$ | 227 | 0.000 |  |
| Cr <sub>3</sub> O                               | $Pm\bar{3}n$ | 223 | 0.000 |  |
| CrO <sub>2</sub>                                | $P4_2/mnm$   | 136 | 0.000 |  |
| Cu <sub>3</sub> TeO <sub>6</sub>                | $Ia\bar{3}$  | 206 | 0.000 |  |
| FeO                                             | $Fm\bar{3}m$ | 225 | 0.000 |  |
| IrO <sub>2</sub>                                | $Pa\bar{3}$  | 205 | 0.000 |  |
| K(IrO <sub>2</sub> ) <sub>4</sub>               | $I4/m$       | 87  | 0.000 |  |
| K(Mo <sub>2</sub> O <sub>3</sub> ) <sub>2</sub> | $P4/mbm$     | 127 | 0.000 |  |
| K <sub>2</sub> Ta <sub>15</sub> O <sub>32</sub> | $R\bar{3}$   | 148 | 0.000 |  |
| K <sub>4</sub> (CoO <sub>2</sub> ) <sub>7</sub> | $P6_3/m$     | 176 | 0.000 |  |
| KCr <sub>4</sub> O <sub>8</sub>                 | $I4/m$       | 87  | 0.000 |  |
| KIrO <sub>3</sub>                               | $Pn\bar{3}$  | 201 | 0.000 |  |
| KO <sub>2</sub>                                 | $I4/mmm$     | 139 | 0.000 |  |

|                                          |              |     |       |
|------------------------------------------|--------------|-----|-------|
| $\text{KV}_4\text{O}_8$                  | $I4/m$       | 87  | 0.000 |
| $\text{MgTi}_2\text{O}_4$                | $Fd\bar{3}m$ | 227 | 0.000 |
| $\text{MgV}_2\text{O}_4$                 | $Fd\bar{3}m$ | 227 | 0.000 |
| $\text{Mn}_2\text{O}_3$                  | $Ia\bar{3}$  | 206 | 0.000 |
| $\text{MnO}_2$                           | $P4_2/mnm$   | 136 | 0.000 |
| $\text{MoO}_2$                           | $P4_2/mnm$   | 136 | 0.000 |
| $\text{Na}(\text{Mo}_2\text{O}_3)_2$     | $P4/mbm$     | 127 | 0.000 |
| $\text{NaMn}_7\text{O}_{12}$             | $Im\bar{3}$  | 204 | 0.000 |
| $\text{NaO}_2$                           | $Pa\bar{3}$  | 205 | 0.000 |
| $\text{NaTi}_8\text{O}_{13}$             | $R\bar{3}$   | 148 | 0.000 |
| $\text{NaV}_6\text{O}_{11}$              | $P6_3mc$     | 186 | 0.000 |
| $\text{NaWO}_3$                          | $Pm\bar{3}m$ | 221 | 0.000 |
| $\text{Nb}_4\text{O}_5$                  | $P4_2/nmc$   | 137 | 0.000 |
| $\text{Rb}_2\text{Ta}_{15}\text{O}_{32}$ | $R\bar{3}$   | 148 | 0.000 |
| $\text{Rb}_4\text{Nb}_{11}\text{O}_{30}$ | $R\bar{3}m$  | 166 | 0.000 |
| $\text{ReO}_2$                           | $P4_2/mnm$   | 136 | 0.000 |
| $\text{ReO}_3$                           | $Im\bar{3}$  | 204 | 0.000 |
| $\text{RhO}_2$                           | $P4_2/mnm$   | 136 | 0.000 |
| $\text{Sb}_2\text{O}_5$                  | $Fd\bar{3}m$ | 227 | 0.000 |

|                                                  |              |     |       |
|--------------------------------------------------|--------------|-----|-------|
| SbO <sub>2</sub>                                 | $Fd\bar{3}m$ | 227 | 0.000 |
| Sr <sub>2</sub> IrO <sub>4</sub>                 | $I4_1/acd$   | 142 | 0.000 |
| Sr <sub>2</sub> Nb <sub>5</sub> O <sub>9</sub>   | $P4/mmm$     | 123 | 0.000 |
| Sr <sub>2</sub> TcO <sub>4</sub>                 | $I4/mmm$     | 139 | 0.000 |
| Sr <sub>2</sub> VO <sub>4</sub>                  | $I4/mmm$     | 139 | 0.000 |
| Sr <sub>3</sub> (CoO <sub>3</sub> ) <sub>2</sub> | $R\bar{3}c$  | 167 | 0.000 |
| Sr <sub>4</sub> Cr <sub>3</sub> O <sub>9</sub>   | $P\bar{3}$   | 143 | 0.000 |
| Sr <sub>4</sub> IrO <sub>6</sub>                 | $R\bar{3}c$  | 167 | 0.000 |
| Sr <sub>4</sub> RhO <sub>6</sub>                 | $R\bar{3}c$  | 167 | 0.000 |
| Sr <sub>4</sub> V <sub>3</sub> O <sub>10</sub>   | $I4/mmm$     | 139 | 0.000 |
| Sr <sub>7</sub> Nb <sub>6</sub> O <sub>21</sub>  | $R\bar{3}$   | 148 | 0.000 |
| SrCo <sub>12</sub> O <sub>19</sub>               | $P6_3/mmc$   | 194 | 0.000 |
| SrCo <sub>6</sub> O <sub>11</sub>                | $P6_3/mmc$   | 194 | 0.000 |
| SrMoO <sub>3</sub>                               | $Pm\bar{3}m$ | 221 | 0.000 |
| SrNbO <sub>3</sub>                               | $Pm\bar{3}m$ | 221 | 0.000 |
| SrV <sub>6</sub> O <sub>11</sub>                 | $P6_3/mmc$   | 194 | 0.000 |
| TaO <sub>2</sub>                                 | $P4_2/mnm$   | 136 | 0.000 |
| TeO <sub>2</sub>                                 | $P4_2/mnm$   | 136 | 0.000 |
| Ti <sub>2</sub> O <sub>3</sub>                   | $R\bar{3}c$  | 167 | 0.000 |

|                              |              |     |       |
|------------------------------|--------------|-----|-------|
| $\text{Ti}_4\text{O}_5$      | $I4/m$       | 87  | 0.000 |
| $\text{Ti}_6\text{O}$        | $P\bar{3}1m$ | 162 | 0.000 |
| $\text{Tl}_2\text{O}_3$      | $Ia\bar{3}$  | 206 | 0.000 |
| $\text{Tl}_2\text{TeO}_6$    | $P321$       | 150 | 0.000 |
| $\text{V}_{13}\text{O}_{16}$ | $I4_1/amd$   | 141 | 0.000 |
| $\text{V}_{16}\text{O}_3$    | $I4/mmm$     | 139 | 0.000 |
| $\text{WO}_2$                | $P4_2/mnm$   | 136 | 0.000 |
| $\text{Yb}_2\text{O}_3$      | $Ia\bar{3}$  | 206 | 0.000 |

Table S2 Bulk modulus,  $B_{vrh}$ , and shear modulus,  $G_{vrh}$ , calculated using the Voigt-Reuss-Hill approximation, the Grüneisen constant,  $\gamma$ , the Clarke thermal conductivity,  $\kappa_{Clarke}$ , the Cahill thermal conductivity,  $\kappa_{Cahill}$ , the Slack thermal conductivity,  $\kappa_{Slack}$ , and the maximum thermal conductivity,  $\kappa_{max}$ , between  $\kappa_{Clarke}$  and  $\kappa_{Slack}$  for the binary and ternary oxides at 1000 K.

| formula                                         | $B_{vrh}$<br>(GPa) | $G_{vrh}$<br>(GPa) | $\gamma$ | $\kappa_{Clarke}$<br>(Wm <sup>-1</sup> K <sup>-1</sup> ) | $\kappa_{Cahill}$<br>(Wm <sup>-1</sup> K <sup>-1</sup> ) | $\kappa_{Slack}$<br>(Wm <sup>-1</sup> K <sup>-1</sup> ) | $\kappa_{max}$<br>(Wm <sup>-1</sup> K <sup>-1</sup> ) |
|-------------------------------------------------|--------------------|--------------------|----------|----------------------------------------------------------|----------------------------------------------------------|---------------------------------------------------------|-------------------------------------------------------|
| Al <sub>2</sub> O <sub>3</sub>                  | 234.343            | 144.074            | 1.476    | 2.737                                                    | 2.991                                                    | 5.864                                                   | 5.864                                                 |
| As <sub>2</sub> O <sub>3</sub>                  | 9.938              | 5.724              | 1.541    | 0.345                                                    | 0.379                                                    | 0.077                                                   | 0.345                                                 |
| As <sub>2</sub> O <sub>5</sub>                  | 93.753             | 51.418             | 1.591    | 1.213                                                    | 1.333                                                    | 1.248                                                   | 1.248                                                 |
| B <sub>2</sub> O <sub>3</sub>                   | 45.957             | 44.602             | 1.063    | 1.740                                                    | 1.895                                                    | 4.011                                                   | 4.011                                                 |
| Ba <sub>2</sub> ZrO <sub>4</sub>                | 104.762            | 55.270             | 1.631    | 0.878                                                    | 0.967                                                    | 3.125                                                   | 3.125                                                 |
| Ba <sub>3</sub> Mn <sub>2</sub> O <sub>8</sub>  | 62.924             | 28.780             | 1.782    | 0.722                                                    | 0.804                                                    | 0.313                                                   | 0.722                                                 |
| Ba <sub>3</sub> Y <sub>4</sub> O <sub>9</sub>   | 99.925             | 47.869             | 1.733    | 0.857                                                    | 0.951                                                    | 0.626                                                   | 0.857                                                 |
| Ba <sub>4</sub> Nb <sub>2</sub> O <sub>9</sub>  | 72.579             | 30.955             | 1.858    | 0.700                                                    | 0.784                                                    | 0.341                                                   | 0.700                                                 |
| Ba <sub>5</sub> Ta <sub>4</sub> O <sub>15</sub> | 113.227            | 60.231             | 1.623    | 0.888                                                    | 0.978                                                    | 1.313                                                   | 1.313                                                 |
| Ba <sub>8</sub> V <sub>7</sub> O <sub>22</sub>  | 45.029             | 27.719             | 1.474    | 0.706                                                    | 0.772                                                    | 0.214                                                   | 0.706                                                 |
| BaCoO <sub>2</sub>                              | 77.419             | 27.762             | 2.050    | 0.666                                                    | 0.760                                                    | 0.483                                                   | 0.666                                                 |
| BaHgO <sub>2</sub>                              | 45.633             | 8.740              | 2.747    | 0.284                                                    | 0.358                                                    | 0.049                                                   | 0.284                                                 |
| BaMnO <sub>3</sub>                              | 72.401             | 12.480             | 2.858    | 0.519                                                    | 0.667                                                    | 0.076                                                   | 0.519                                                 |
| BaMoO <sub>4</sub>                              | 52.397             | 24.352             | 1.765    | 0.659                                                    | 0.733                                                    | 0.367                                                   | 0.659                                                 |
| BaO <sub>2</sub>                                | 70.113             | 35.462             | 1.675    | 0.742                                                    | 0.820                                                    | 1.682                                                   | 1.682                                                 |
| BaTa <sub>2</sub> O <sub>6</sub>                | 160.878            | 84.962             | 1.630    | 1.086                                                    | 1.197                                                    | 0.776                                                   | 1.086                                                 |
| BaTiO <sub>3</sub>                              | 163.849            | 107.202            | 1.415    | 1.444                                                    | 1.574                                                    | 12.889                                                  | 12.889                                                |
| BaV <sub>6</sub> O <sub>11</sub>                | 166.546            | 51.414             | 2.218    | 1.268                                                    | 1.474                                                    | 0.441                                                   | 1.268                                                 |
| BaWO <sub>4</sub>                               | 49.562             | 22.915             | 1.771    | 0.556                                                    | 0.618                                                    | 0.489                                                   | 0.556                                                 |



|                                                 |         |         |       |       |       |        |        |
|-------------------------------------------------|---------|---------|-------|-------|-------|--------|--------|
| BaZnO <sub>2</sub>                              | 79.781  | 32.948  | 1.893 | 0.707 | 0.795 | 0.740  | 0.740  |
| BaZrO <sub>3</sub>                              | 148.340 | 93.162  | 1.455 | 1.211 | 1.322 | 10.226 | 10.226 |
| Ca <sub>2</sub> Hf <sub>7</sub> O <sub>16</sub> | 188.244 | 91.240  | 1.720 | 1.184 | 1.312 | 0.895  | 1.184  |
| Ca <sub>2</sub> MnO <sub>4</sub>                | 120.441 | 68.360  | 1.556 | 1.517 | 1.665 | 2.026  | 2.026  |
| Ca <sub>2</sub> Nb <sub>2</sub> O <sub>7</sub>  | 140.721 | 88.295  | 1.456 | 1.526 | 1.666 | 4.023  | 4.023  |
| Ca <sub>2</sub> Ta <sub>2</sub> O <sub>7</sub>  | 155.654 | 97.299  | 1.459 | 1.327 | 1.449 | 3.778  | 3.778  |
| CaCrO <sub>4</sub>                              | 17.264  | 27.497  | 0.713 | 0.862 | 0.970 | 5.062  | 5.062  |
| CaMoO <sub>4</sub>                              | 67.730  | 33.595  | 1.696 | 0.972 | 1.076 | 1.051  | 1.051  |
| CaO                                             | 105.983 | 75.109  | 1.338 | 1.528 | 1.662 | 21.468 | 21.468 |
| CaO <sub>2</sub>                                | 70.875  | 47.407  | 1.393 | 1.346 | 1.466 | 7.369  | 7.369  |
| CaTa <sub>2</sub> O <sub>6</sub>                | 160.749 | 35.484  | 2.592 | 0.809 | 0.992 | 0.176  | 0.809  |
| CaTa <sub>4</sub> O <sub>11</sub>               | 165.369 | 33.330  | 2.692 | 0.770 | 0.959 | 0.149  | 0.770  |
| CaV <sub>4</sub> O <sub>9</sub>                 | 42.214  | 37.634  | 1.133 | 1.077 | 1.171 | 1.728  | 1.728  |
| CdIn <sub>2</sub> O <sub>4</sub>                | 122.470 | 45.614  | 2.008 | 0.864 | 0.982 | 0.850  | 0.864  |
| CdO <sub>2</sub>                                | 107.251 | 36.554  | 2.107 | 0.868 | 0.997 | 0.617  | 0.868  |
| CoO <sub>2</sub>                                | 43.671  | 6.573   | 2.997 | 0.502 | 0.664 | 0.056  | 0.502  |
| Cr <sub>2</sub> O <sub>3</sub>                  | 206.172 | 114.571 | 1.578 | 1.974 | 2.168 | 3.286  | 3.286  |
| Cs <sub>2</sub> V <sub>5</sub> O <sub>13</sub>  | 25.348  | 8.231   | 2.161 | 0.447 | 0.517 | 0.069  | 0.447  |
| Fe <sub>2</sub> O <sub>3</sub>                  | 191.441 | 85.539  | 1.808 | 1.678 | 1.872 | 1.619  | 1.678  |
| Ga <sub>2</sub> O <sub>3</sub>                  | 199.308 | 87.752  | 1.824 | 1.581 | 1.767 | 1.470  | 1.581  |
| GeO <sub>2</sub>                                | 52.015  | 26.520  | 1.667 | 0.843 | 0.931 | 0.902  | 0.902  |
| HfO <sub>2</sub>                                | 254.816 | 115.216 | 1.795 | 1.296 | 1.444 | 8.581  | 8.581  |
| In <sub>2</sub> O <sub>3</sub>                  | 118.390 | 55.450  | 1.757 | 0.979 | 1.088 | 0.692  | 0.979  |
| K <sub>2</sub> V <sub>3</sub> O <sub>8</sub>    | 40.422  | 19.441  | 1.729 | 0.787 | 0.872 | 0.347  | 0.787  |

|                  |         |         |       |       |       |        |        |
|------------------|---------|---------|-------|-------|-------|--------|--------|
| $K_2Zn_6O_7$     | 70.566  | 27.503  | 1.957 | 0.827 | 0.935 | 0.292  | 0.827  |
| $K_4Zr_5O_{12}$  | 128.410 | 54.349  | 1.867 | 1.152 | 1.291 | 1.211  | 1.211  |
| $K_5V_3O_{10}$   | 5.491   | 1.795   | 2.153 | 0.238 | 0.274 | 0.003  | 0.238  |
| $K_6CdO_4$       | 32.155  | 15.079  | 1.756 | 0.580 | 0.645 | 0.254  | 0.580  |
| $KO_3$           | 21.848  | 6.988   | 2.178 | 0.539 | 0.623 | 0.076  | 0.539  |
| $KReO_4$         | 29.160  | 7.627   | 2.404 | 0.381 | 0.454 | 0.058  | 0.381  |
| $Li_3CuO_3$      | 50.888  | 36.284  | 1.333 | 1.370 | 1.490 | 1.138  | 1.370  |
| $Mg(RhO_2)_2$    | 174.460 | 53.906  | 2.217 | 1.160 | 1.348 | 0.857  | 1.160  |
| $Mg_2Mo_3O_8$    | 129.549 | 55.769  | 1.848 | 1.266 | 1.417 | 0.908  | 1.266  |
| $Mg_3Nb_6O_{11}$ | 180.711 | 89.631  | 1.696 | 1.478 | 1.635 | 2.640  | 2.640  |
| $Mg_4Nb_2O_9$    | 142.786 | 68.198  | 1.736 | 1.561 | 1.732 | 2.814  | 2.814  |
| $Mg_6MnO_8$      | 131.662 | 100.013 | 1.274 | 2.093 | 2.275 | 8.164  | 8.164  |
| $MgCr_2O_4$      | 159.369 | 77.780  | 1.713 | 1.692 | 1.874 | 3.008  | 3.008  |
| $MgO_2$          | 122.826 | 82.654  | 1.388 | 2.093 | 2.280 | 6.261  | 6.261  |
| $MgTa_2O_6$      | 182.312 | 94.648  | 1.648 | 1.314 | 1.450 | 2.817  | 2.817  |
| $MgTiO_3$        | 159.352 | 81.970  | 1.658 | 1.869 | 2.062 | 2.131  | 2.131  |
| $Mn_3O_4$        | 130.113 | 44.306  | 2.108 | 1.179 | 1.354 | 0.827  | 1.179  |
| $MnO$            | 146.459 | 64.486  | 1.824 | 1.353 | 1.511 | 6.726  | 6.726  |
| $Na_{14}Cd_2O_9$ | 44.199  | 27.897  | 1.450 | 0.940 | 1.026 | 0.802  | 0.940  |
| $Na_2O_2$        | 52.683  | 29.695  | 1.563 | 1.201 | 1.318 | 1.259  | 1.259  |
| $Na_2Ta_4O_{11}$ | 160.990 | 55.703  | 2.090 | 1.012 | 1.160 | 0.347  | 1.012  |
| $Na_3CoO_2$      | 13.838  | 17.041  | 0.881 | 0.676 | 0.744 | 1.239  | 1.239  |
| $Na_4Ti_5O_{12}$ | 128.665 | 61.167  | 1.741 | 1.572 | 1.745 | 1.656  | 1.656  |
| $NaNbO_2$        | 125.719 | 97.398  | 1.256 | 1.567 | 1.703 | 10.082 | 10.082 |

|                                                  |         |         |       |       |       |        |        |
|--------------------------------------------------|---------|---------|-------|-------|-------|--------|--------|
| NaNbO <sub>3</sub>                               | 79.316  | 35.171  | 1.816 | 1.020 | 1.139 | 0.511  | 1.020  |
| Nb <sub>2</sub> O <sub>5</sub>                   | 151.015 | 64.298  | 1.860 | 1.254 | 1.405 | 0.833  | 1.254  |
| NbO <sub>2</sub>                                 | 212.585 | 80.208  | 1.993 | 1.402 | 1.591 | 0.871  | 1.402  |
| Pb <sub>3</sub> O <sub>4</sub>                   | 37.066  | 10.815  | 2.281 | 0.312 | 0.365 | 0.047  | 0.312  |
| PoO <sub>2</sub>                                 | 163.502 | 73.207  | 1.805 | 0.927 | 1.034 | 4.868  | 4.868  |
| Rb <sub>3</sub> TaO <sub>8</sub>                 | 32.511  | 11.901  | 2.027 | 0.474 | 0.540 | 0.162  | 0.474  |
| Rb <sub>3</sub> V <sub>5</sub> O <sub>14</sub>   | 46.249  | 21.216  | 1.779 | 0.756 | 0.842 | 1.205  | 1.205  |
| RbScO <sub>2</sub>                               | 94.065  | 57.446  | 1.482 | 1.119 | 1.223 | 3.934  | 3.934  |
| Rh <sub>2</sub> O <sub>3</sub>                   | 225.174 | 99.901  | 1.815 | 1.428 | 1.595 | 1.666  | 1.666  |
| Sb <sub>2</sub> O <sub>3</sub>                   | 13.380  | 9.099   | 1.377 | 0.354 | 0.385 | 0.160  | 0.354  |
| Sc <sub>2</sub> O <sub>3</sub>                   | 163.170 | 80.545  | 1.701 | 1.684 | 1.864 | 1.755  | 1.755  |
| SeO <sub>2</sub>                                 | 23.003  | 10.615  | 1.773 | 0.507 | 0.564 | 0.117  | 0.507  |
| SiO <sub>2</sub>                                 | 4.466   | 25.179  | 0.227 | 0.690 | 1.012 | 12.546 | 12.546 |
| SnO <sub>2</sub>                                 | 172.945 | 85.281  | 1.702 | 1.278 | 1.414 | 5.139  | 5.139  |
| Sr <sub>3</sub> V <sub>2</sub> O <sub>7</sub>    | 136.461 | 72.258  | 1.627 | 1.307 | 1.440 | 3.222  | 3.222  |
| Sr <sub>6</sub> (CoO <sub>3</sub> ) <sub>5</sub> | 42.500  | 47.417  | 0.954 | 0.977 | 1.069 | 3.453  | 3.453  |
| SrMoO <sub>4</sub>                               | 63.350  | 31.011  | 1.710 | 0.825 | 0.913 | 0.906  | 0.906  |
| SrO <sub>2</sub>                                 | 74.651  | 40.367  | 1.606 | 0.958 | 1.053 | 3.780  | 3.780  |
| SrTa <sub>4</sub> O <sub>11</sub>                | 173.097 | 24.156  | 3.071 | 0.643 | 0.866 | 0.070  | 0.643  |
| SrTiO <sub>3</sub>                               | 169.469 | 109.170 | 1.430 | 1.674 | 1.826 | 5.317  | 5.317  |
| SrV <sub>13</sub> O <sub>18</sub>                | 139.227 | 110.175 | 1.237 | 1.806 | 1.962 | 2.347  | 2.347  |
| SrWO <sub>4</sub>                                | 53.623  | 28.202  | 1.635 | 0.670 | 0.739 | 0.750  | 0.750  |
| SrZrO <sub>3</sub>                               | 148.877 | 81.159  | 1.597 | 1.271 | 1.398 | 7.293  | 7.293  |
| Te <sub>4</sub> O <sub>9</sub>                   | 37.347  | 18.330  | 1.707 | 0.582 | 0.644 | 0.347  | 0.582  |

|                               |         |         |       |       |       |        |        |
|-------------------------------|---------|---------|-------|-------|-------|--------|--------|
| TeO <sub>3</sub>              | 99.154  | 97.622  | 1.051 | 1.395 | 1.520 | 13.642 | 13.642 |
| TiO <sub>2</sub>              | 213.729 | 111.104 | 1.647 | 2.051 | 2.262 | 9.814  | 9.814  |
| V <sub>2</sub> O <sub>3</sub> | 193.063 | 64.784  | 2.124 | 1.524 | 1.753 | 0.667  | 1.524  |
| VO <sub>2</sub>               | 234.644 | 117.597 | 1.685 | 2.089 | 2.309 | 9.701  | 9.701  |
| Y <sub>2</sub> O <sub>3</sub> | 137.879 | 64.126  | 1.765 | 1.141 | 1.269 | 1.064  | 1.141  |
| ZnO <sub>2</sub>              | 144.282 | 62.406  | 1.843 | 1.422 | 1.591 | 1.784  | 1.784  |
| ZrO <sub>2</sub>              | 165.676 | 52.087  | 2.197 | 1.150 | 1.335 | 1.485  | 1.485  |

## References

1. J. P. Perdew, A. Ruzsinszky, G. I. Csonka, O. A. Vydrov, G. E. Scuseria, L. A. Constantin, X. Zhou and K. Burke, *Phys. Rev. Lett.*, 2008, **100**, 136406.
2. S. L. Dudarev, G. A. Botton, S. Y. Savrasov, C. J. Humphreys and A. P. Sutton, *Phys. Rev. B*, 1998, **57**, 1505–1509.
3. T. Liu, M. Dupuis and C. Li, *J. Phys. Chem. C*, 2016, **120**, 6930–6937.
4. A. I. Liechtenstein, V. I. Anisimov and J. Zaanen, *Phys. Rev. B*, 1995, **52**, R5467–R5470.
5. S. Okamoto, A. J. Millis and N. A. Spaldin, *Phys. Rev. Lett.*, 2006, **97**, 056802.
6. J. Heyd, G. E. Scuseria and M. Ernzerhof, *J. Chem. Phys.*, 2003, **118**, 8207–8215.
7. S. Chen, Y. Qi, G. Liu, J. Yang, F. Zhang and C. Li, *Chem. Commun.*, 2014, **50**, 14415–14417.
8. F. Subhan, S. Azam, G. Khan, M. Irfan, S. Muhammad, A. G. Al-Sehemi, S. H. Naqib, R. Khenata, S. Khan, I. V. Kityk and B. Amin, *J. Alloys Compd.*, 2019, **785**, 232-239.
9. W. Li, J. Carrete, N. A. Katcho and N. Mingo, *Comput. Phys. Commun.*, 2014, **185**, 1747–1758.
10. A. Togo, F. Oba and I. Tanaka, *Phys. Rev. B*, 2008, **78**, 134106.
11. H. Muta, K. Kurosaki and S. Yamanaka, *J. Alloys Compd.*, 2005, **392**, 306-309.
